# Supplementary material
Source: PubMed Central journal article supplement (PMC4262537)
Supplement: NIHMS634743-supplement-Supplemental_Digital_Content.pdf [file NIHMS634743-supplement-Supplemental_Digital_Content.pdf]

Supplemental Table 1 DMPA dosage and MPA levels in

plasma

| Macaque ID      | Weight (kg) | mg/kg DMPA | Plasma MPA (pg/mL)/weight (kg) |       |       |         |         |        |         |         |         |         |        |        |
|-----------------|-------------|------------|--------------------------------|-------|-------|---------|---------|--------|---------|---------|---------|---------|--------|--------|
|                 |             |            | Week                           |       |       |         |         |        |         |         |         |         |        |        |
|                 |             |            | -6                             | -4    | -3    | -2      | 0       | 2      | 3       | 4       | 5       | 6       | 8      | 9      |
| T1 <sup>1</sup> | 7.3         | 4.1        | 59.6                           | 74.0  | 36.6  | 9217.7  | 786.0   | 913.6  | 564.9   | 19791.1 | 11935.6 | 18741.1 | 4326.4 | 1636.4 |
| T2              | 5.6         | 5.4        | 116.4                          | 69.8  | 95.2  | 17947.0 | 978.4   | 2761.3 | 674.1   | 19149.3 | 72929.6 | 11633.6 | 724.1  | 512.3  |
| T3              | 5.2         | 5.8        | 101.0                          | 60.4  | 36.9  | 14942.5 | 4753.8  | 266.3  | 38434.0 | 7813.3  | 9685.8  | 709.2   | 80.4   | 110.8  |
| T4              | 6.1         | 4.9        | 60.8                           | 73.8  | 32.1  | 27497.9 | 1752.5  | 442.0  | 118.5   | 8744.1  | 2606.2  | 804.3   | 205.4  | 131.8  |
| T5              | 6.5         | 4.6        | 59.1                           | 66.3  | 43.8  | 7847.2  | 1484.8  | 1219.7 | 14009.2 | 5905.7  | 12211.4 | 1737.7  | 1149.7 | 659.7  |
| T6              | 5.4         | 5.6        | nd                             | nd    | 58.1  | 14520.4 | 566.7   | 106.9  | 70.6    | 22460.4 | nd      | nd      | nd     | nd     |
| T median        | 5.9         | 5.1        |                                |       |       |         |         |        |         |         |         |         |        |        |
| P1 <sup>2</sup> | 5.5         | 5.5        | 98.4                           | 112.5 | 52.2  | 27256.4 | 714.0   | 375.8  | 181.3   | 7823.8  | 4975.5  | 1718.7  | 398.5  | 129.3  |
| P2              | 5.9         | 5.1        | 56.4                           | 58.5  | 78.0  | 15549.2 | 922.2   | 441.0  | 74.7    | 24964.7 | 25211.5 | 10760.2 | 1224.2 | 121.4  |
| P3              | 5.4         | 5.6        | 71.7                           | 59.6  | 55.2  | 15598.0 | 3931.7  | 8344.4 | 1941.1  | 24069.3 | 11083.9 | 3708.5  | 941.3  | 218.7  |
| P4              | 6.2         | 4.8        | 50.8                           | 48.1  | 73.9  | 19011.0 | 13631.1 | 787.9  | 19944.0 | 12833.9 | 31056.6 | 11227.7 | 279.7  | 142.1  |
| P5              | 7.1         | 4.2        | 50.8                           | 37.9  | 37.3  | 9584.1  | 5110.7  | 439.6  | 105.8   | 13443.1 | 13162.3 | 7027.3  | 342.5  | 173.5  |
| P6              | 8.0         | 3.8        | 57.0                           | 109.1 | 136.5 | 5779.8  | 32652.8 | 2714.0 | 347.0   | 2678.9  | 4834.6  | 17633.0 | 240.3  | 45.8   |
| P median        | 6.1         | 5.0        |                                |       |       |         |         |        |         |         |         |         |        |        |
| P&T median      | 6.0         | 5.0        |                                |       |       |         |         |        |         |         |         |         |        |        |

<sup>1</sup>T - TDF IVR group

<sup>2</sup>P - Placebo group

Shaded areas are one week post DMPA injection.

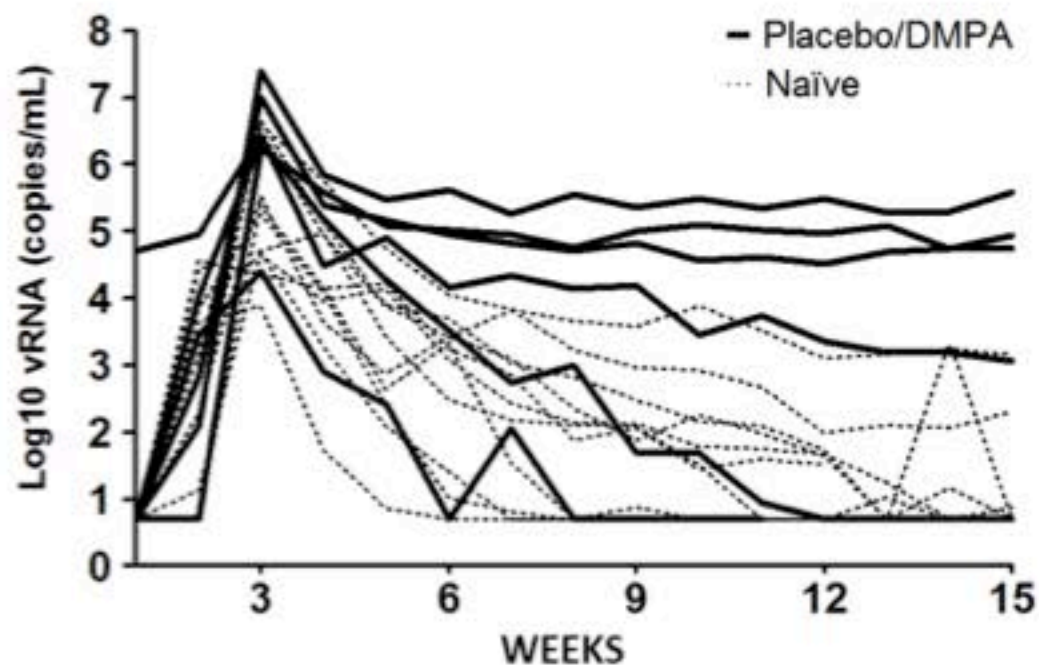

**Supplemental Figure 1. Plasma viral loads for individual infected control macaques.** Peak viral loads were aligned for comparison of naïve/cycling controls and placebo IVR/DMPA controls.
